# Supplementary material for: Hierarchical MnCo2O4nanosheet arrays/carbon cloths as integrated anodes for lithium-ion batteries with improved performance
Source: Royal Society of Chemistry journal article supplement (doi:10.1039/c4nr01998a), 2014-01-01
Supplement: c4nr01998a1.pdf [file c4nr01998a1.pdf]

## Hierarchical $\text{MnCo}_2\text{O}_4$ nanosheets arrays/carbon cloth as integrated anodes for lithium-ion full batteries with improved performance

Xiaojuan Hou, Xianfu Wang, Bin Liu, Qiufan Wang, Tao Luo, Di Chen\* and Guozhen Shen\*

5

10

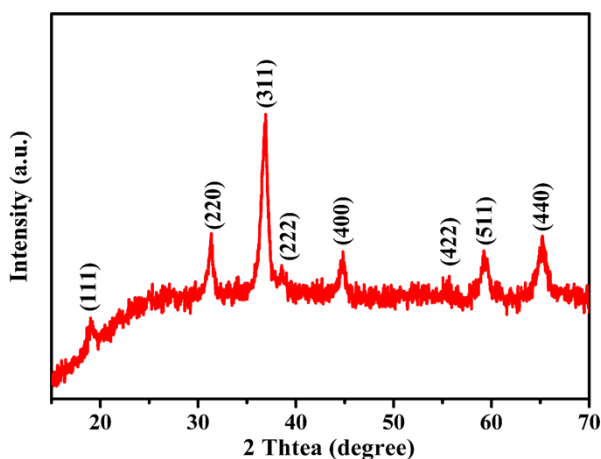

Figure S1 The XRD pattern of the  $\text{MnCo}_2\text{O}_4$  powders.

15

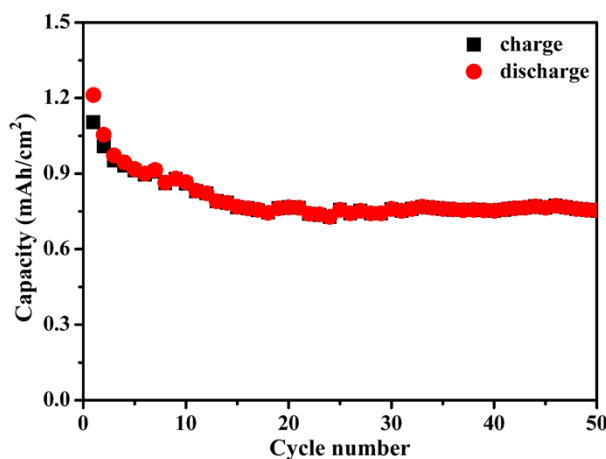

Figure S2 The cycling performance of the pure carbon cloth based electrode at a current density of  $800 \mu\text{A cm}^{-2}$ .

20

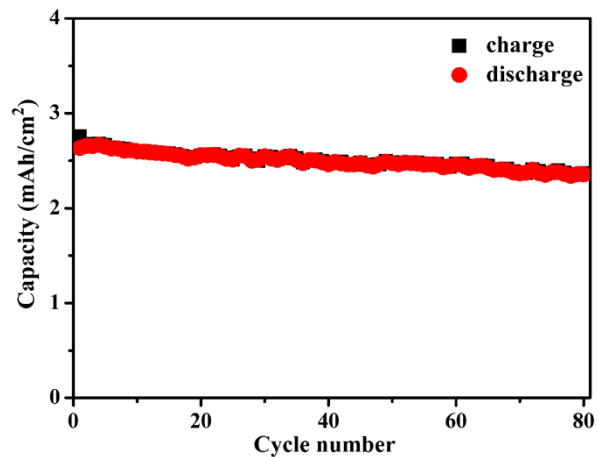

**Figure S3** The cycling performance of the commercial LiCoO<sub>2</sub>/Al foil based 5 electrode at a current density of 800  $\mu\text{A cm}^{-2}$
